# Supplementary material
Source: publisher figshare collection journal article supplement (https://aacr.figshare.com/articles/dataset/_/22455974)
Supplement: Supplementary file 1 [file 39907127]

## Supplemental Figure Legend

**Figure S1.** Structures and synthetic scheme for abi and  $\Delta^4$ -abi. Numbered compounds are fully described in the manuscript text. Compound 4 is abi and compound 5 is  $\Delta^4$ -abi.
